# Supplementary material
Source: publisher site journal article supplement (https://www.dovepress.com/article/213520)
Supplement: Supplementary file 1 [file get_supplementary_file.php]

**Table S1** Pre-index variables included in IPTW models for commercial/MAPD and PDP populations

| **Variable category** | **Commercial/MAPD** | **PDP** |
| --- | --- | --- |
| **Demographics** | Index month/year in 3-month intervals  Age (years)  Gender  Region  Business line (commercial or MAPD)  Health plan type (categorical)  Pharmacy plan type: defined standard | Index month/year in 3-month intervals |
|  | Age (years) |
|  | Gender |
|  | Region |
|  | Pharmacy plan type |
|  |  |
|  |  |
| **Clinical characteristics/comorbidities** | COPD diagnosis  Asthma diagnosis  COPD severity score (categorical)  Charlson Comorbidity Index (categorical)  Select AHRQ-defined comorbiditiesa  Number of unique medications (categorical) | Chronic Disease Score (categorical)  Number of unique medications (categorical) |
|  |
|  |
|  |
|  |
|  |
| **COPD exacerbations** | Severe COPD exacerbations  Moderate COPD exacerbations  COPD exacerbation on index date |  |
|  |
|  |
| **Respiratory medication use** | SABA prescription fills (categorical)  SAMA/SABA use  LAMA use  Methylxanthine use  Index fill ≥90-day fill  ≥6 SAMA/SABA units  CTR (CTR non-missing flag, CTR continuous) | SAMA/SABA use  LAMA use  ≥6 SAMA/SABA units  CTR (CTR non-missing flag, CTR continuous) |
|  |
|  |
|  |
|  |
|  |
|  |
| **All-cause and COPD-related healthcare utilization and costs (categorical)** | COPD-related ambulatory visit counts  All-cause medical costs  COPD-related pharmacy costs  Index prescription patient-paid costs  COPD-related patient-paid pharmacy costs | Index prescription patient-paid costs  COPD-related patient-paid pharmacy costs |
|  |
|  |
|  |

aSelect AHRQ-defined comorbidities included COPD and bronchiectasis, other lower respiratory diseases, hypertension, disorders of lipid metabolism, diseases of the heart, respiratory infections, eye disorders, diseases of the urinary system, non-traumatic joint disorders, and other connective tissue disease.

AHRQ, Agency for Healthcare Research and Quality; COPD, chronic obstructive pulmonary disease; CTR, COPD treatment ratio; IPTW, inverse probability of treatment weighting; LAMA, long-acting muscarinic antagonist; MAPD, Medicare Advantage with Part D; PDP, Part D only; SABA, short-acting β2-agonist; SAMA, short-acting muscarinic antagonist.

**Table S2** Pre-index variables with residual imbalance after IPTW included as covariates in the multivariable-adjusted analysis

| **Variable category** | **Variable** |
| --- | --- |
| **Demographics** | Age in years (categorized) |
|  | Enhanced Alternative (pharmacy plan type) |
|  | Employer Group (pharmacy plan type) |
| **Respiratory medication use** | Methylxanthine use |
|  | Nebulized SABA use |
|  | Nebulized SAMA use |
|  | Nebulized SAMA/SABA use |
|  | Index fill: mail order fill |
|  | Index fill: ≥90-day fill |

IPTW, inverse probability of treatment weighting; SABA, short-acting β2-agonist; SAMA, short-acting muscarinic antagonist

**Table S3** Rescue medication use post-IPTW (ITT analysis)

| **Independent variables** | **Rescue medication units PPPY** | **Standard error** | **95% CI** | **Two-sided  *P*-value** | **Non-inferiority *P*-value** | **Superiority *P*-value** |
| --- | --- | --- | --- | --- | --- | --- |
| **Cohort** | | | | | | |
| UMEC/VI | -0.155 | 0.062 | -0.277, -0.037 | 0.011 | <0.001 | 0.005 |
| TIO/OLO | ref. | – | – | – | – | – |
| **Age categories** | | | | | | |
| 40–49 | 0.569 | 0.330 | -0.025, 1.273 | 0.090 | – | – |
| 50–59 | 1.310 | 0.219 | 0.895, 1.747 | <0.001 | – | – |
| 60–64 | 1.295 | 0.203 | 0.912, 1.701 | <0.001 | – | – |
| 65–69 | 0.964 | 0.142 | 0.689, 1.240 | <0.001 | – | – |
| 70–74 | 0.492 | 0.103 | 0.286, 0.692 | <0.001 | – | – |
| 75–79 | 0.211 | 0.103 | 0.009, 0.413 | 0.039 | – | – |
| 80–84 | 0.157 | 0.112 | -0.060, 0.374 | 0.160 | – | – |
| ≥85 | ref. | – | – | – | – | – |
| **Pharmacy plan type** | | | | | | |
| Enhanced Alternative | -0.018 | 0.106 | -0.225, 0.192 | 0.857 | – | – |
| Employer Group | 0.121 | 0.179 | -0.227, 0.480 | 0.503 | – | – |
| **Baseline medication units indicators** | | | | | | |
| Methylxanthine use | 1.769 | 0.464 | 0.890, 2.733 | 0.002 | – | – |
| SABA nebulized use | 3.456 | 0.472 | 2.597, 4.451 | <0.001 | – | – |
| SAMA nebulized use | 1.765 | 1.642 | -1.206, 5.205 | 0.303 | – | – |
| SAMA/SABA nebulized use | 2.821 | 0.437 | 1.986, 3.704 | <0.001 | – | – |
| Index fill mail order pharmacy | -0.093 | 0.177 | -0.437, 0.254 | 0.600 | – | – |
| Index fill ≥90-day fill | 0.075 | 0.144 | -0.200, 0.364 | 0.605 | – | – |

CI, confidence interval; IPTW, inverse probability of treatment weighting; ITT, intent-to-treat; PPPY, per patient per year; SABA, short-acting
β2-agonist; SAMA, short-acting muscarinic antagonist; TIO/OLO, tiotropium bromide/olodaterol; UMEC/VI, umeclidinium/vilanterol.

**Table S4** Medication adherence post-IPTW (on-treatment sensitivity analysis)

| **Independent variable** | **Odds ratio for PDC≥0.80** | **95% CI** | ***P*-value** |
| --- | --- | --- | --- |
| **Cohort** | | | |
| UMEC/VI | 1.360 | 1.237, 1.494 | <0.001 |
| TIO/OLO | ref. | – | – |
| **Age categories** | | | |
| 40–49 | 0.547 | 0.346, 0.866 | 0.010 |
| 50–59 | 1.020 | 0.815, 1.277 | 0.862 |
| 60–64 | 1.033 | 0.818, 1.305 | 0.785 |
| 65–69 | 1.086 | 0.911, 1.294 | 0.357 |
| 70–74 | 1.151 | 0.987, 1.342 | 0.072 |
| 75–79 | 0.973 | 0.831, 1.139 | 0.735 |
| 80–84 | 1.116 | 0.942, 1.322 | 0.203 |
| ≥85 | ref. | – | – |
| **Pharmacy plan type** | | | |
| Enhanced Alternative | 0.815 | 0.718, 0.925 | 0.002 |
| Employer Group | 1.025 | 0.848, 1.240 | 0.798 |
| **Baseline medication units indicators** | | | |
| Methylxanthine use | 1.850 | 1.298, 2.635 | <0.001 |
| SABA nebulized use | 1.013 | 0.794, 1.293 | 0.916 |
| SAMA nebulized use | 0.933 | 0.424, 2.054 | 0.864 |
| SAMA/SABA nebulized use | 1.165 | 0.861, 1.575 | 0.322 |
| Index fill mail order pharmacy | 0.737 | 0.592, 0.918 | 0.006 |
| Index fill ≥90-day fill | 2.178 | 1.824, 2.601 | <0.001 |

CI, confidence interval; PDC, proportion of days covered; PPPY, per patient per year; SABA, short-acting β2-agonist; SAMA, short-acting muscarinic antagonist; TIO/OLO, tiotropium bromide/olodaterol; UMEC/VI, umeclidinium/vilanterol.
